# Supplementary material for: Split tolerance permits safe Ad5-GUCY2C-PADRE vaccine-induced T-cell responses in colon cancer patients
Source: Springer Nature journal article supplement (doi:10.1186/s40425-019-0576-2), 2019-04-22
Supplement: 40425_2019_576_MOESM1_ESM.pdf [file 40425_2019_576_MOESM1_ESM.pdf]

**Additional File 1 for**

**Split Tolerance Permits Safe Ad5-GUCY2C-PADRE Vaccine-Induced T-cell Responses in Colon Cancer Patients**

Adam E. Snook<sup>1\*</sup>, Trevor R. Baybutt<sup>1</sup>, Bo Xiang<sup>1</sup>, Tara S. Abraham<sup>1</sup>, John C. Flickinger Jr.<sup>1</sup>, Terry Hyslop<sup>2</sup>,  
Tingting Zhan<sup>1</sup>, Walter K. Kraft<sup>1</sup>, Takami Sato<sup>3</sup>, and Scott A. Waldman<sup>1\*</sup>

Departments of <sup>1</sup>Pharmacology and Experimental Therapeutics and <sup>3</sup>Medical Oncology, Thomas Jefferson University, Philadelphia, PA 19107

<sup>2</sup>Department of Biostatistics and Bioinformatics, Duke Cancer Institute, Duke University, Durham, NC 27710

**This file includes:**

|                                                                                               |               |
|-----------------------------------------------------------------------------------------------|---------------|
| Supplementary Table 1. Baseline characteristics of CRC patients treated with Ad5-GUCY2C-PADRE | <b>Page 1</b> |
| Supplementary Table 2. Summary of immune responses to Ad5-GUCY2C-PADRE                        | <b>Page 2</b> |
| Supplementary Figure 1. Ad5-GUCY2C-PADRE-induced immune responses                             | <b>Page 3</b> |

**Supplementary Table 1.** Baseline characteristics of CRC patients treated with Ad5-GUCY2C-PADRE

| <b>Baseline Characteristic</b> | <b>(n = 10)</b> |
|--------------------------------|-----------------|
| Median age (range)             | 65 (49-76)      |
| Male (%)                       | 5 (50%)         |
| Race                           |                 |
| Caucasian (%)                  | 8 (80%)         |
| African American (%)           | 2(20%)          |
| TNM Staging                    |                 |
| Stage I (%)                    | 9 (90%)         |
| Stage II (%)                   | 1 (10%)         |

**Supplementary Table 2.** Summary of immune responses to Ad5-GUCY2C-PADRE

| Patient | Peak GUCY2C Antibody Titer <sup>a</sup> | Antigen-Specific T-Cell Response <sup>b</sup> at Day 30, Significance <sup>c</sup> |                  |       |                  | Ad5 NAb Titer <sup>a,d</sup> | Ad5 NAb Status <sup>d</sup> |
|---------|-----------------------------------------|------------------------------------------------------------------------------------|------------------|-------|------------------|------------------------------|-----------------------------|
|         |                                         | GUCY2C                                                                             |                  | PADRE |                  |                              |                             |
| 1001    | 20                                      | 0.00                                                                               | <i>P</i> = NS    | 0.00  | <i>P</i> = NS    | 1074                         | High                        |
| 1002    | ND <sup>e</sup>                         | 8.67                                                                               | <i>P</i> = NS    | 0.42  | <i>P</i> = NS    | 15951                        | High                        |
| 1003    | ND                                      | 2.00                                                                               | <i>P</i> = NS    | 0.50  | <i>P</i> = NS    | 4379                         | High                        |
| 1004    | ND                                      | 18.00                                                                              | <i>P</i> < 0.001 | 11.50 | <i>P</i> < 0.001 | 60                           | Low                         |
| 1005    | ND                                      | 10.50                                                                              | <i>P</i> = NS    | 0.00  | <i>P</i> = NS    | 12                           | Low                         |
| 1006    | ND                                      | 6.00                                                                               | <i>P</i> = NS    | 1.25  | <i>P</i> = NS    | 27                           | Low                         |
| 1007    | 640                                     | 43.25                                                                              | <i>P</i> < 0.001 | 7.50  | <i>P</i> < 0.001 | 10                           | Low                         |
| 1008    | ND                                      | 63.83                                                                              | <i>P</i> < 0.001 | 0.00  | <i>P</i> = NS    | 19                           | Low                         |
| 1009    | ND                                      | 2.17                                                                               | <i>P</i> = NS    | 0.33  | <i>P</i> = NS    | 1309                         | High                        |
| 1010    | 20                                      | 8.17                                                                               | <i>P</i> < 0.001 | 1.75  | <i>P</i> = NS    | 3355                         | High                        |

<sup>a</sup> Reciprocal dilutions are shown for GUCY2C antibody and Ad5 NAb titers

<sup>b</sup> SFCs/5x10<sup>5</sup> PBMCs

<sup>c</sup> *mDFR*(2x) compared to background and day 0.

<sup>d</sup> Ad5 NAb titers and status prior to Ad5-GUCY2C-PADRE administration are shown

<sup>e</sup> ND = not detected

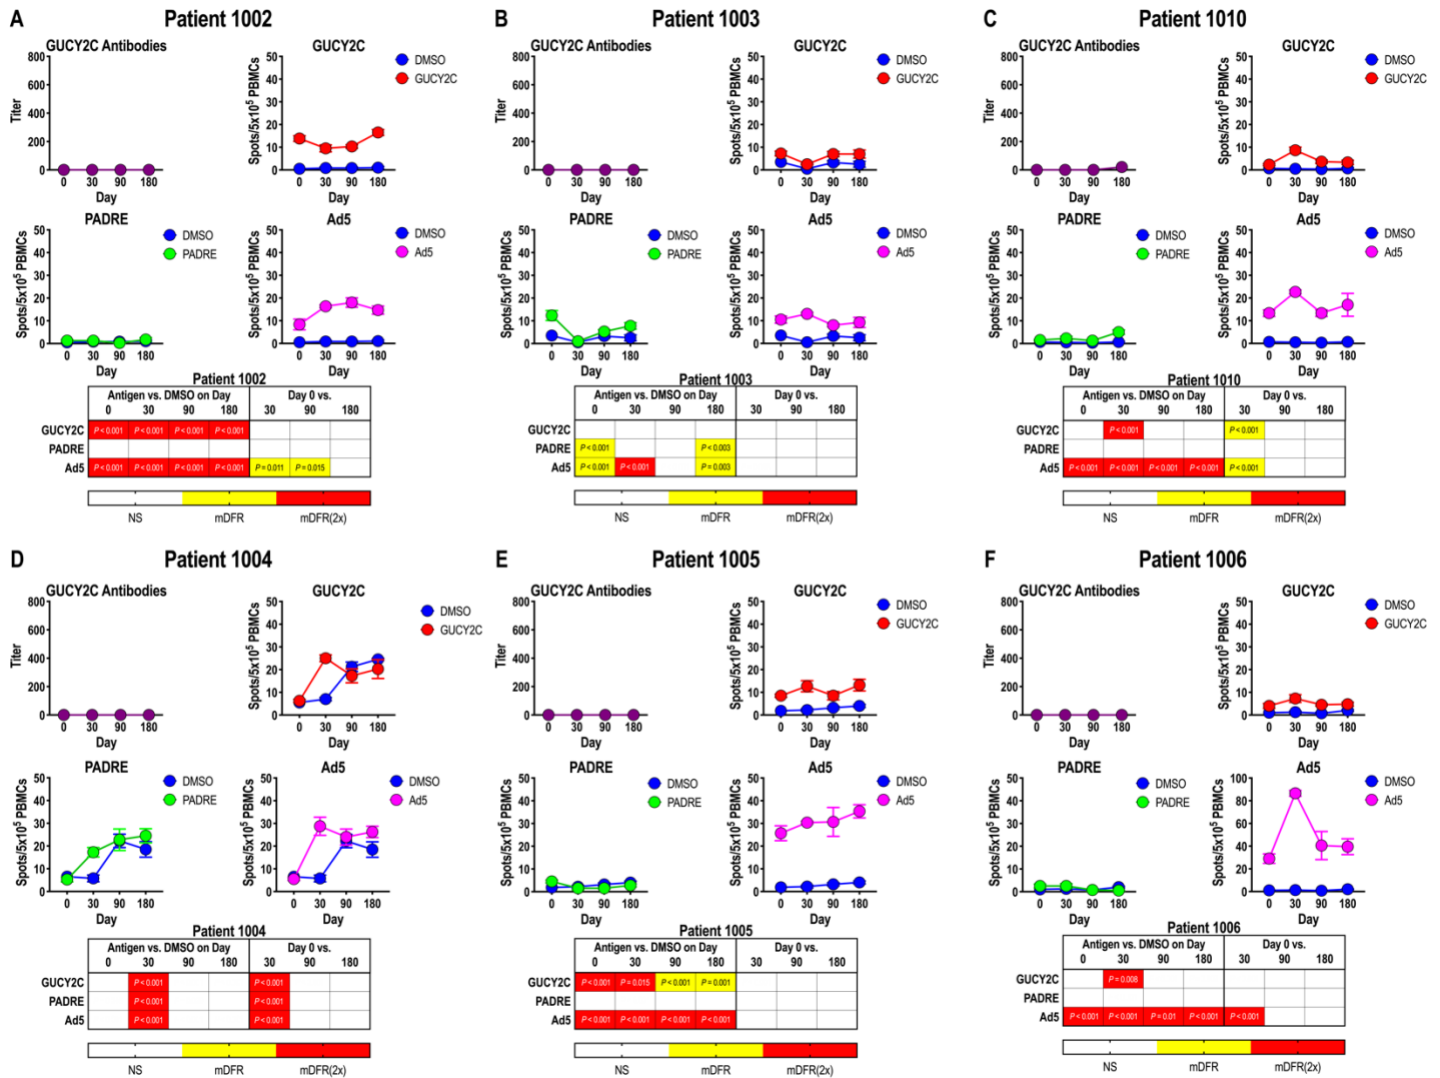

**Figure 1. Ad5-GUCY2C-PADRE-induced immune responses.** Patient blood samples were collected before (day 0) and 30, 90 and 180 days after Ad5-GUCY2C-PADRE immunization. GUCY2C-specific antibody titers were quantified by ELISA and GUCY2C, PADRE, and Ad5 -specific T-cell responses were quantified by IFN $\gamma$ -ELISpot. ELISpot assays employed DMSO as an antigen-negative control. The statistical significance for T-cell responses at each time point (compared to DMSO) was determined by modified DFR(eq) or DFR(2x) after Westfall–Young max-T correction, and p-values <5% are shown in yellow [mDFR(eq)] or red [mDFR(2x)], respectively. The statistical significance of T-cell responses obtained for each post-vaccination time point (compared to day 0) were determined by a similar modified DFR-like permutation method with Westfall–Young max-T correction. Representative GUCY2C non-responders and responders are shown in **Figure 2**. All other patient responses are shown here.
